# Supplementary material for: Effects of Ar or O2 Gas Bubbling for Shape, Size, and Composition Changes in Silver‐Gold Alloy Nanoparticles Prepared from Galvanic Replacement Reaction
Source: Hindawi journal article supplement (doi:10.1155/2013/425071), 2013-01-01
Supplement: f1 [file 425071.f1.zip]

Archive with 2 entries (2 files):
- Description.doc
- Supplementry_Figures.pdf
