# Supplementary material for: Effects of Ar or O2 Gas Bubbling for Shape, Size, and Composition Changes in Silver‐Gold Alloy Nanoparticles Prepared from Galvanic Replacement Reaction
Source: Hindawi journal article supplement (doi:10.1155/2013/425071), 2013-01-01
Supplement: f1 [file 425071.f1.zip › Supplementry_Figures.pdf]

# Supporting Information

## Effects of Ar or O<sub>2</sub> Gas Bubbling for Shape, Size, and Composition Changes in Silver-Gold Alloy Nanoparticles Prepared from Galvanic Replacement Reaction

Md. Jahangir Alam<sup>1</sup> and Masaharu Tsuji<sup>2</sup>

*<sup>1</sup>Department of Agronomy and Agricultural Extension, Rajshahi University, Rajshahi 6205, Bangladesh*

*<sup>2</sup>Institute for Materials Chemistry and Engineering, Kyushu University, Kasuga 816-8580, Japan*

\*To whom correspondence should be addressed: E-mail: jahangir9392004@yahoo.com

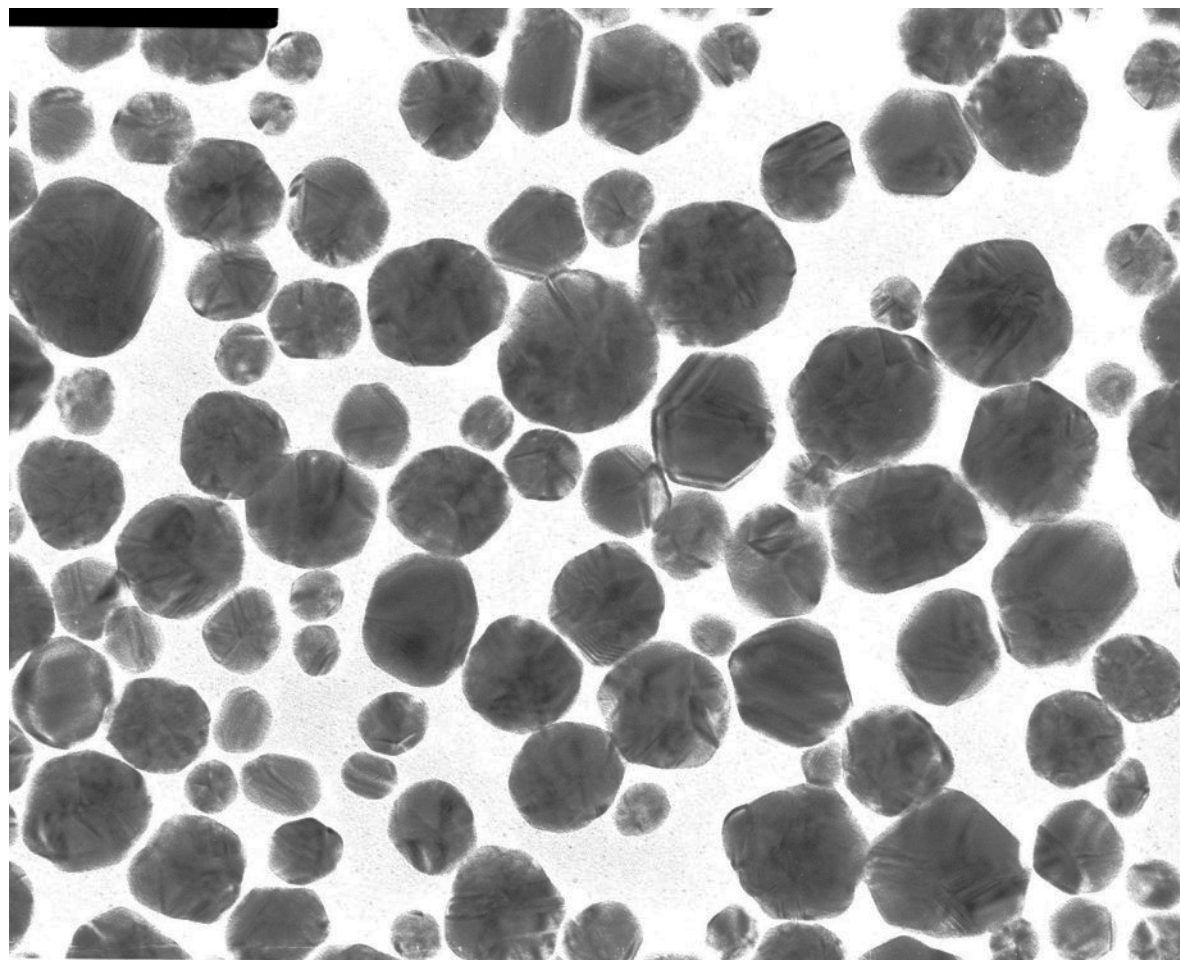

— 50 nm

**Figure S1:** TEM image Ag nanoparticles obtained from  $\text{AgNO}_3/\text{PVP}/\text{EG}$  solution after heating for 50 min under Ar gas bubbling.

**(a) TEM**

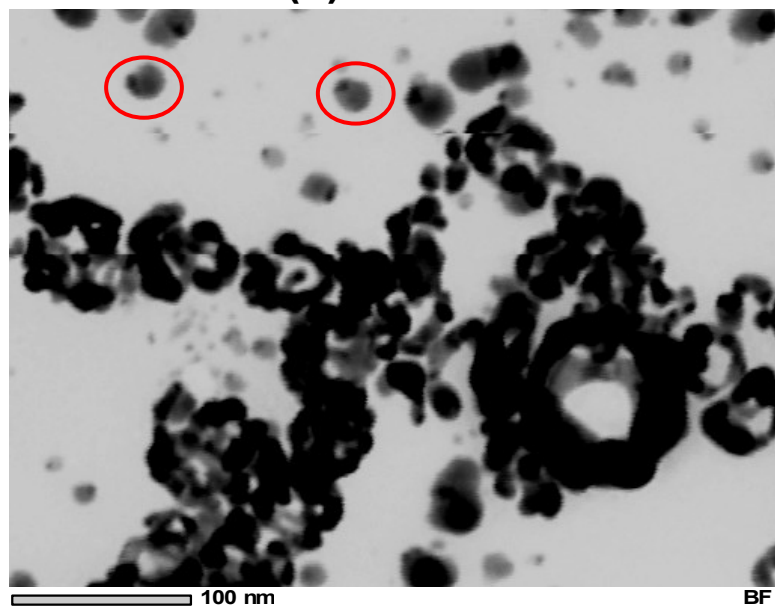

**(b) Au component**

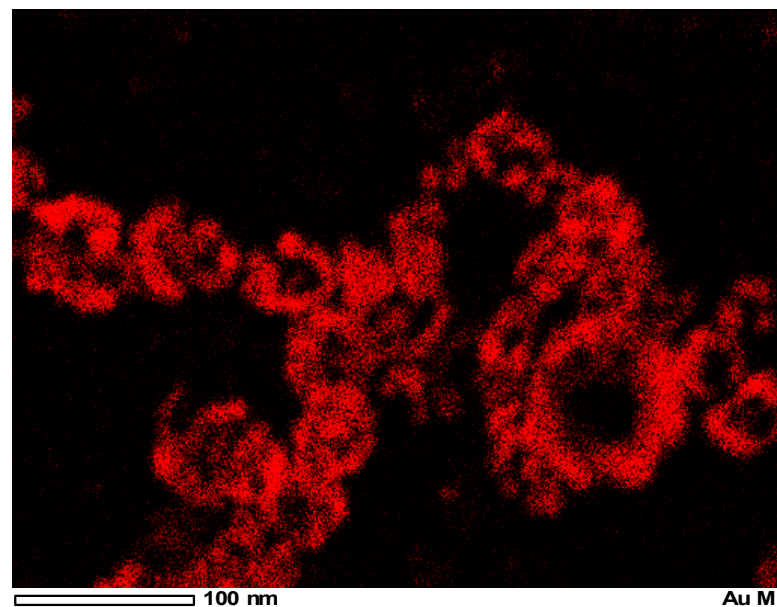

**(c) Ag component**

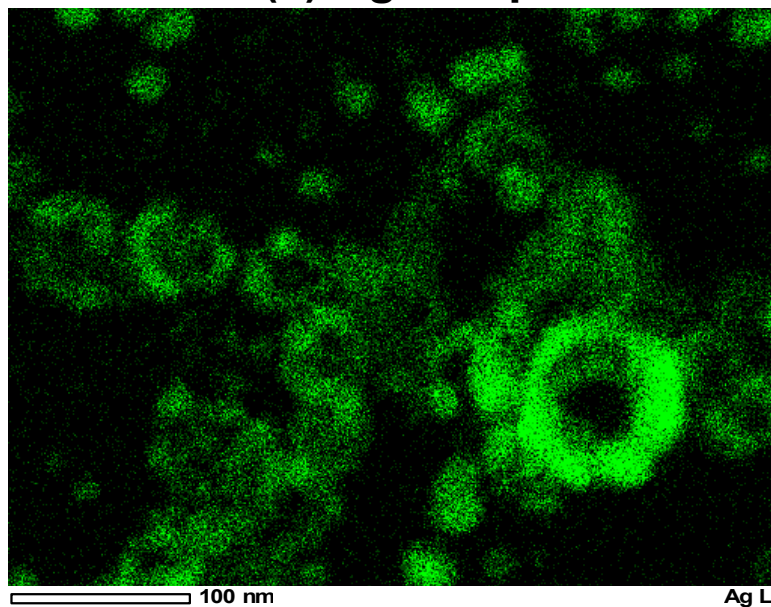

**(d) Au/Ag component**

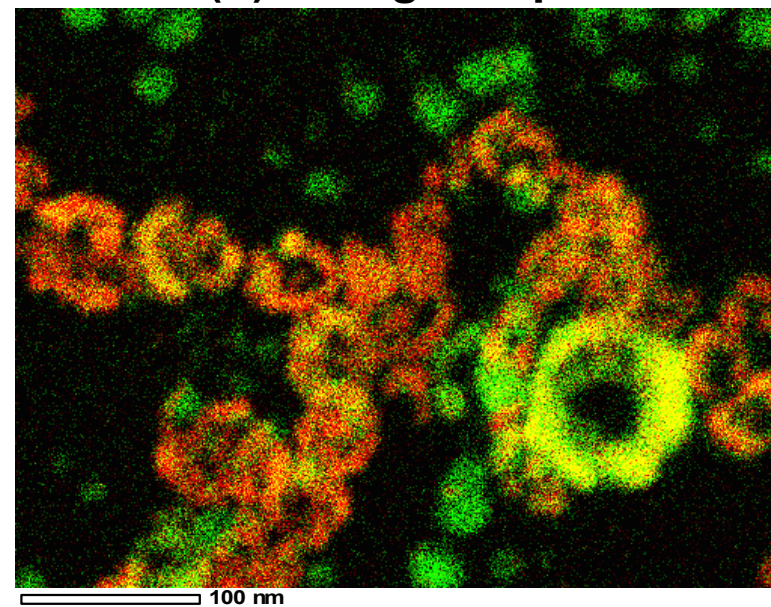

**Figure S2:** Expanded of Figures 2a3-d3.

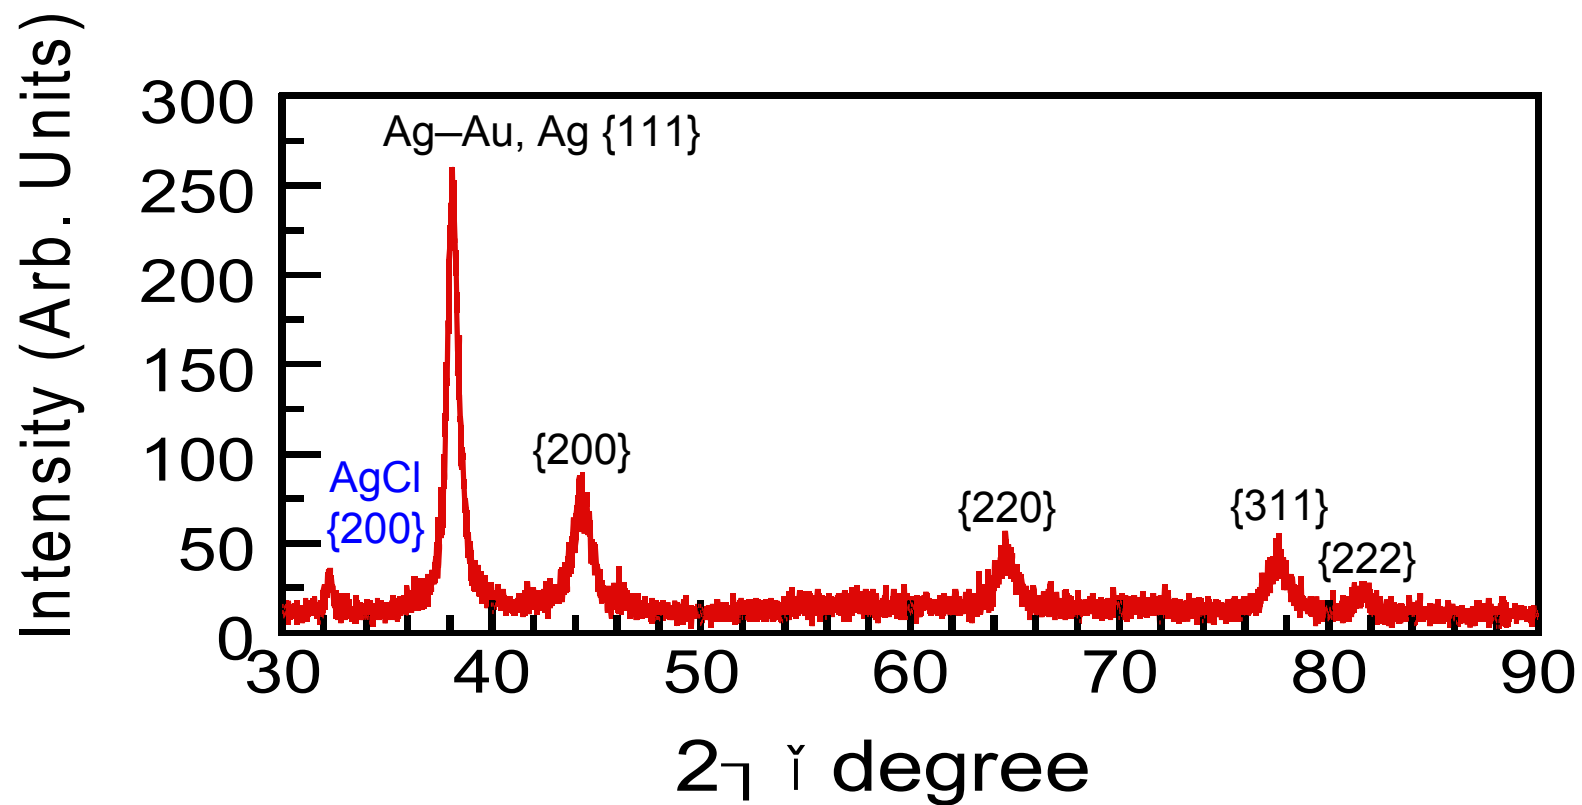

**Figure S3:** XRD pattern of products obtained under Ar bubbling for 60 min.

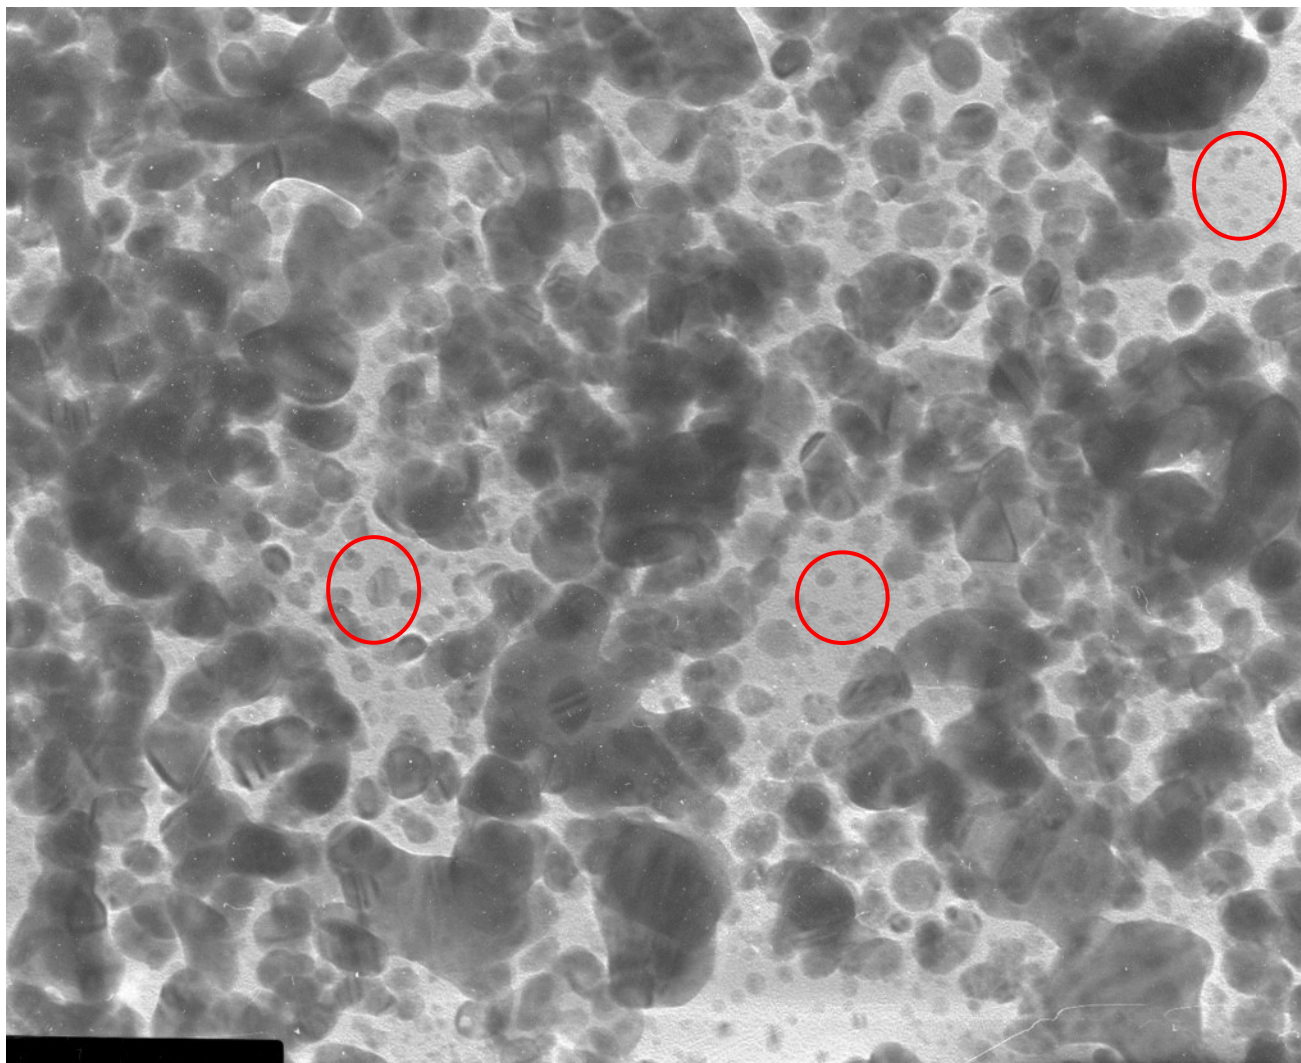

— 50 nm

**Figure S4:** Expanded Figure of ribbon type Au rich Ag/Au alloy particles and small Ag particles that are obtained under O<sub>2</sub> bubbling for 60 min.

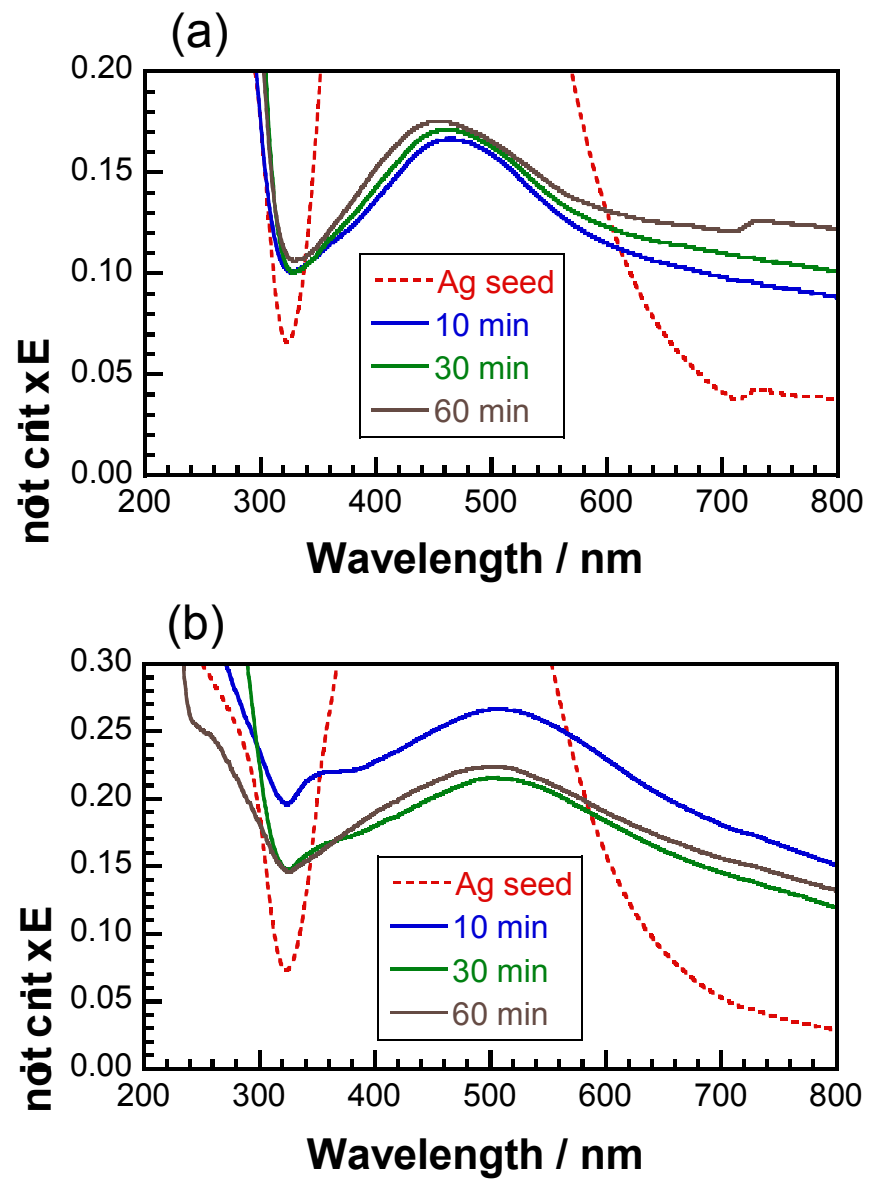

**Figure S5:** Expanded scales of Figures 5a and 5b.
